# Supplementary material for: Comparative transcriptome analysis of roots, stems, and leaves of Pueraria lobata (Willd.) Ohwi: identification of genes involved in isoflavonoid biosynthesis
Source: PubMed Central journal article supplement (PMC7906042; doi:10.7717/peerj.10885), 2021-02-22

### Actin

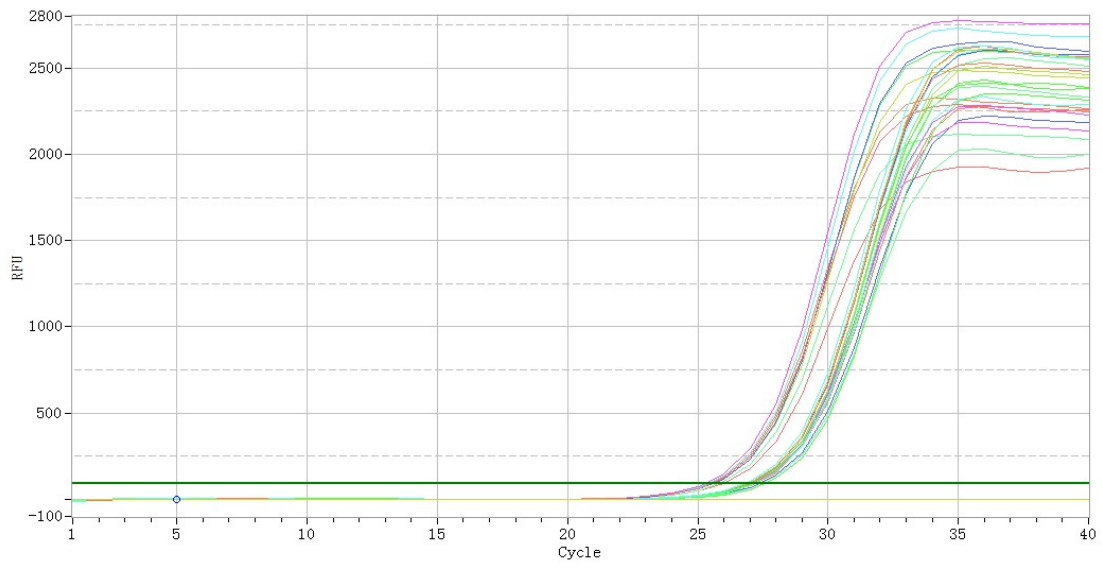

### CL518.Contig3

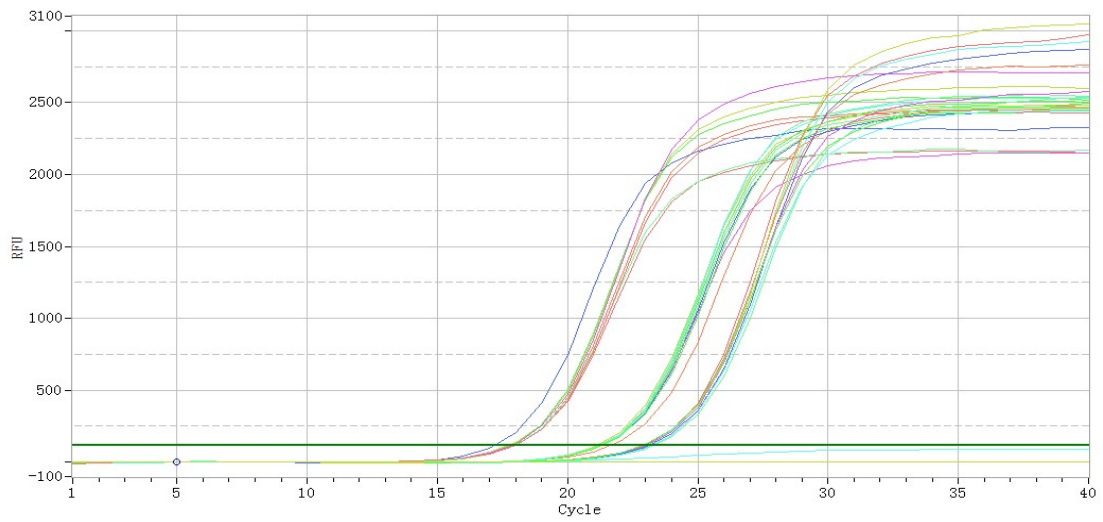

### CL1520.Contig3

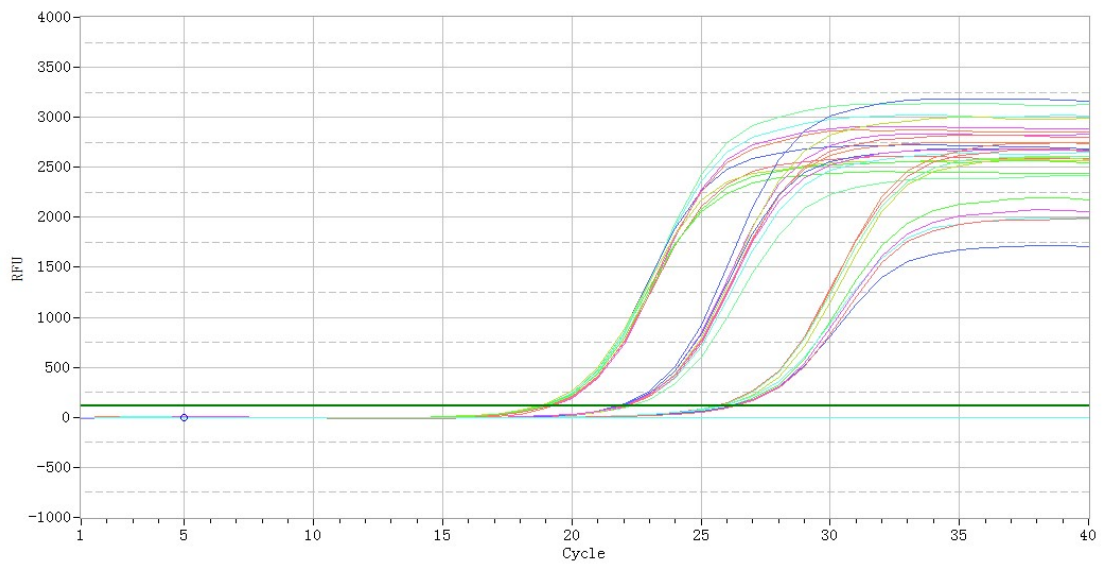

CL2444.Contig2

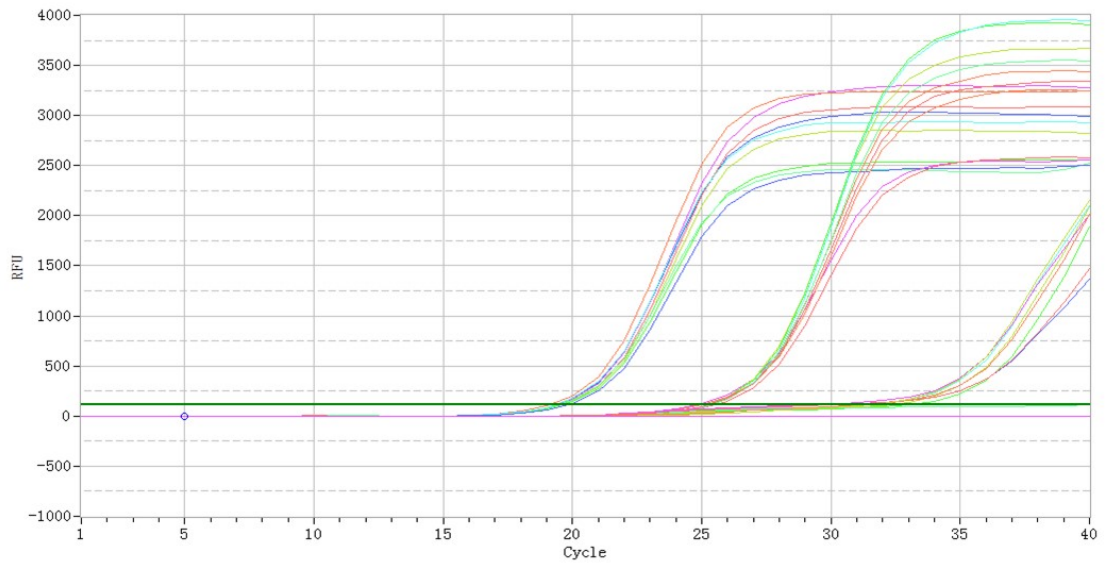

CL2625.Contig2

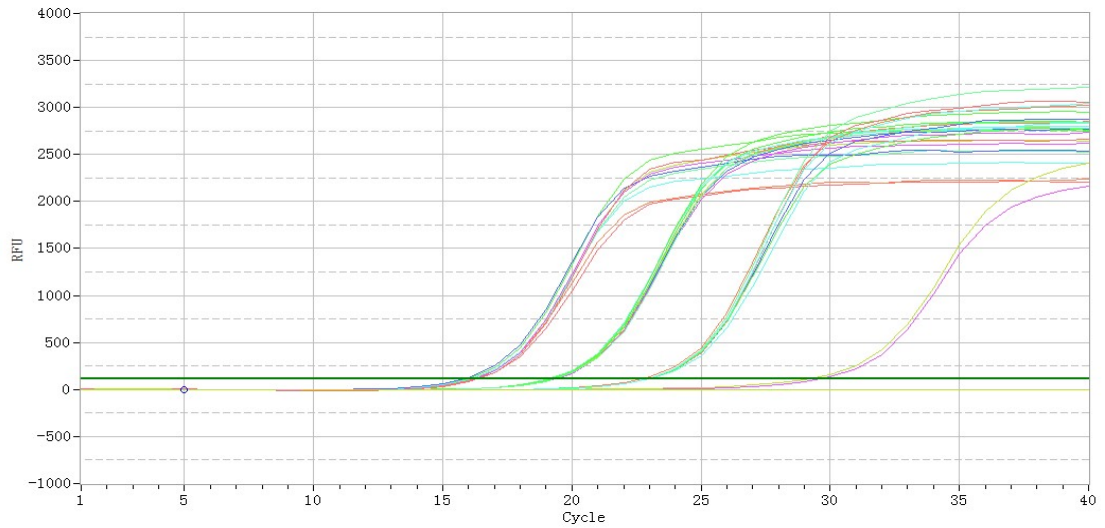

CL3338.Contig1

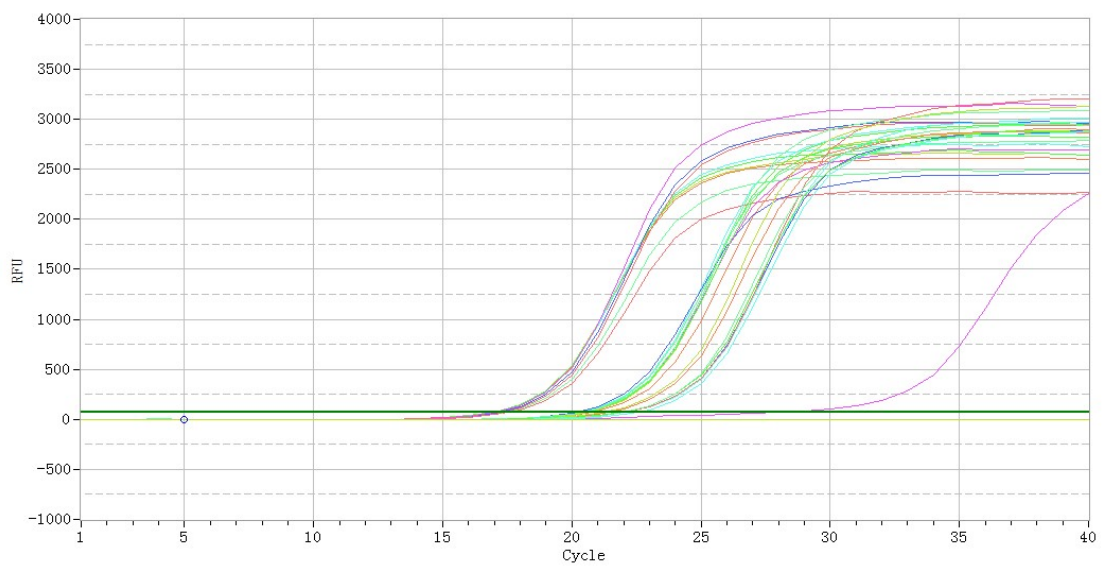

CL10538.Contig1

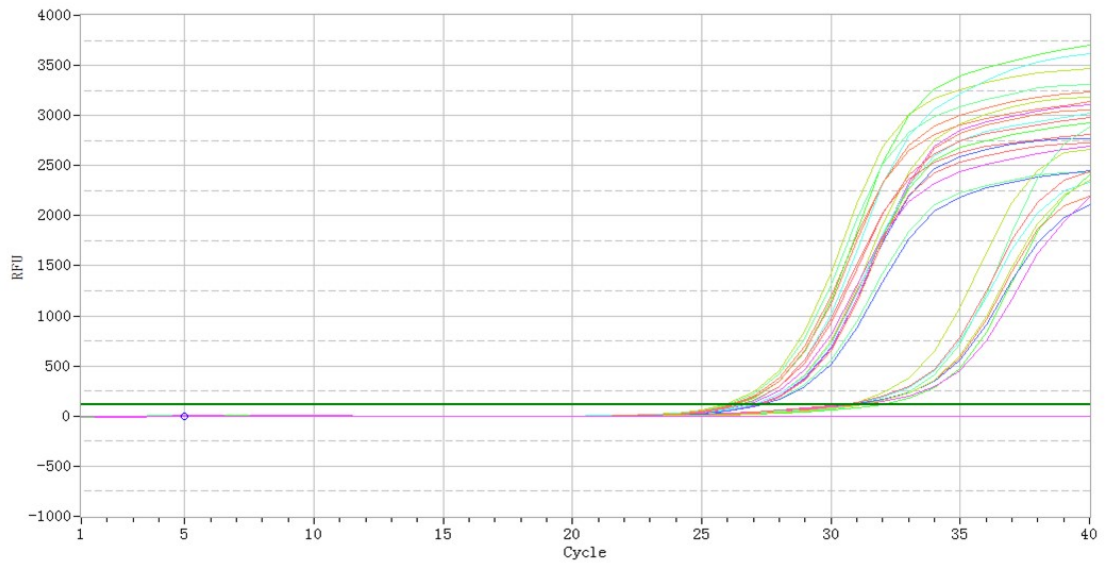

Unigene9945

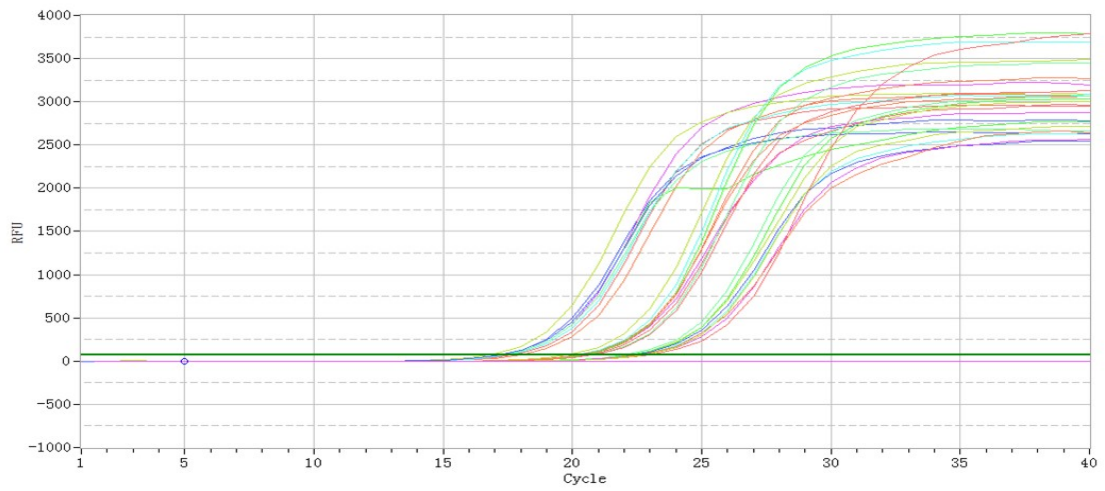

Unigene54862

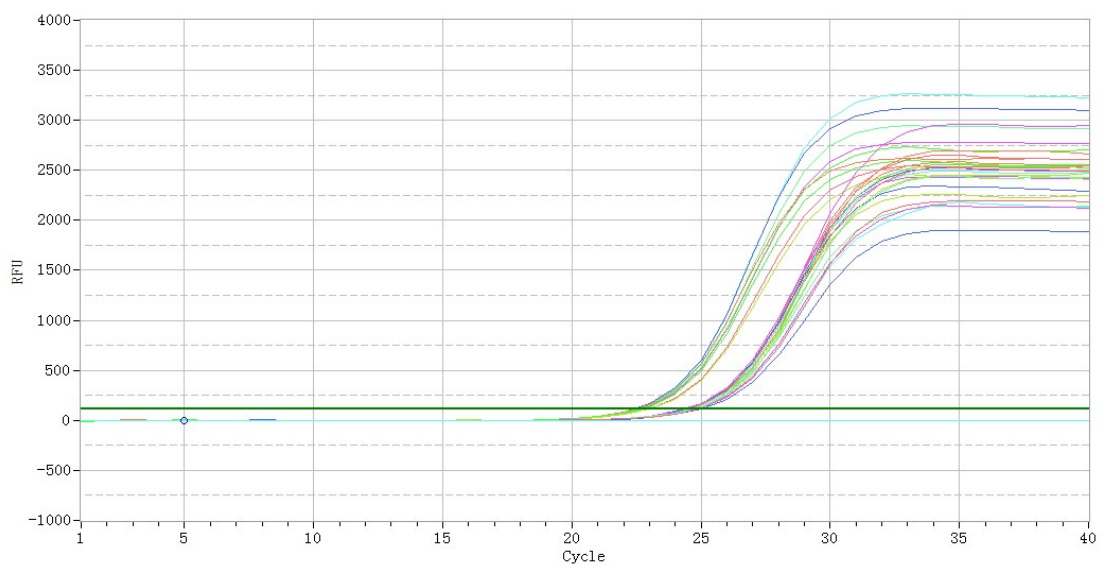

Supplement: peerj-09-10885-s021.pdf [file peerj-09-10885-s021.pdf]
